# Supplementary material for: Screening for frailty phenotype with objectively-measured physical activity in a west Japanese suburban community: evidence from the Sasaguri Genkimon Study
Source: Springer Nature journal article supplement (doi:10.1186/s12877-015-0037-9), 2015-04-02

[A] Age distributions by gender (Census 2010)

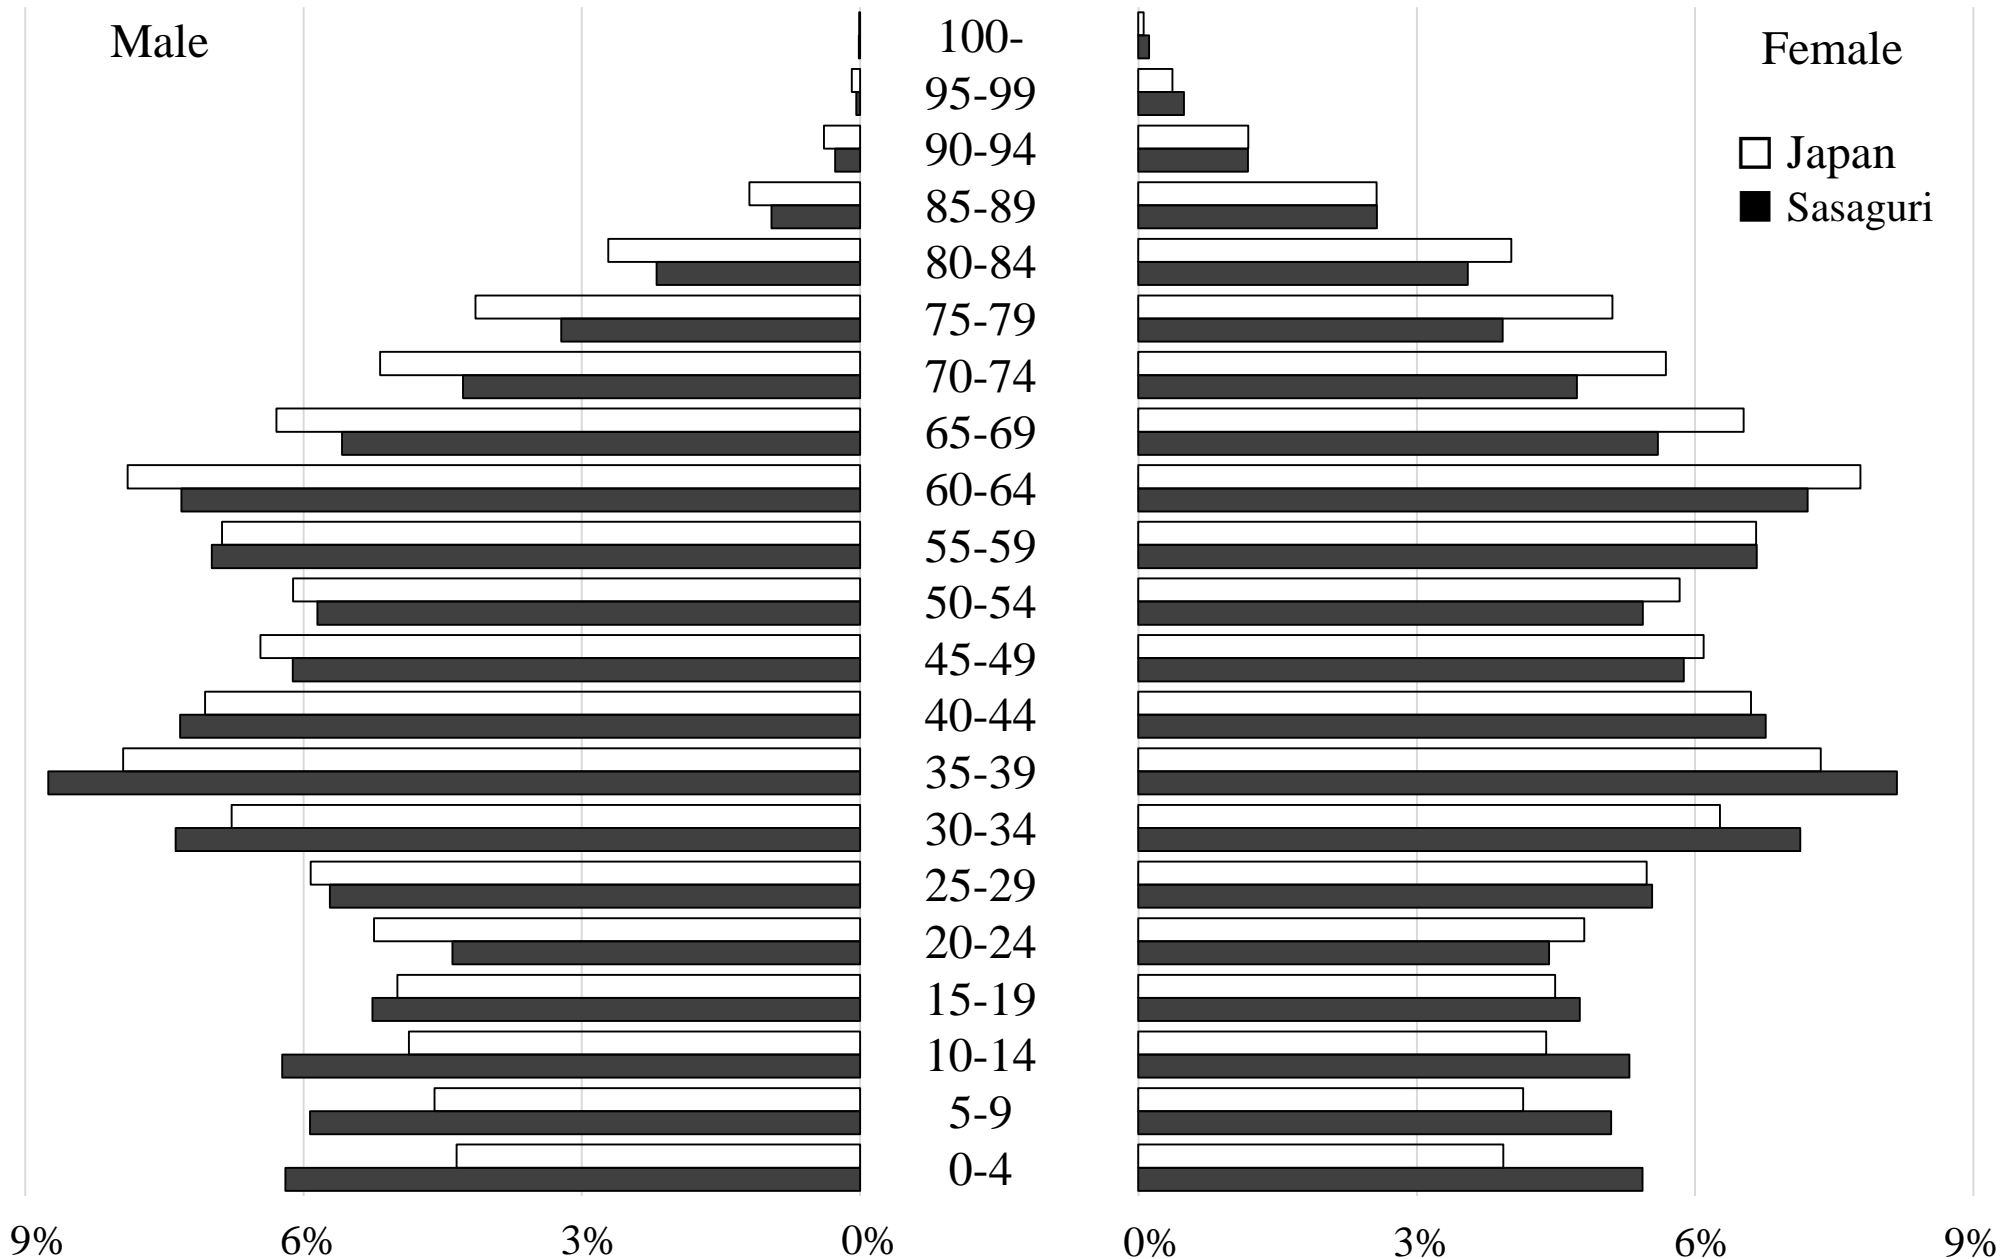

## [B] Occupation (Census 2010)

□ Primary sector of industry   ▨ Secondary sector of industry   ■ Tertiary sector of industry

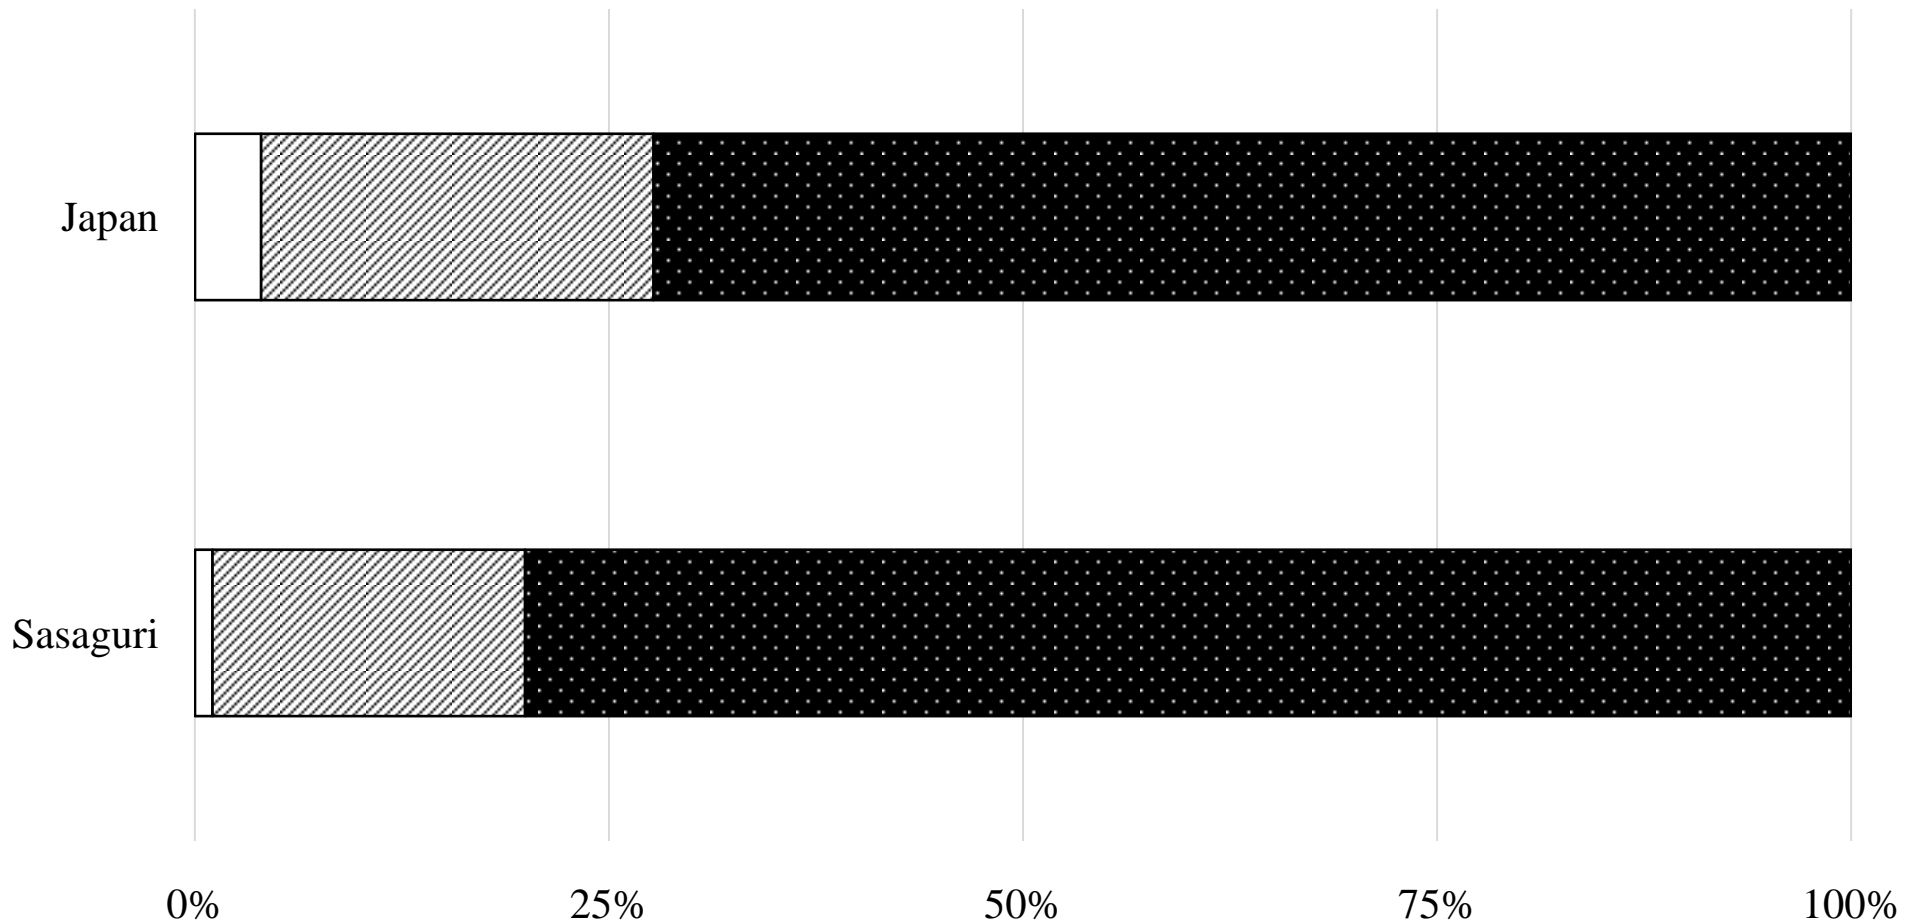

# [C] Educational attainment (Census 2010)

- % Primary/Middle school
- ▣ % Highschool/Middle school under the old-education-system
- ▤ % College
- ▥ % University/Graduate school
- ▦ % Unidentified

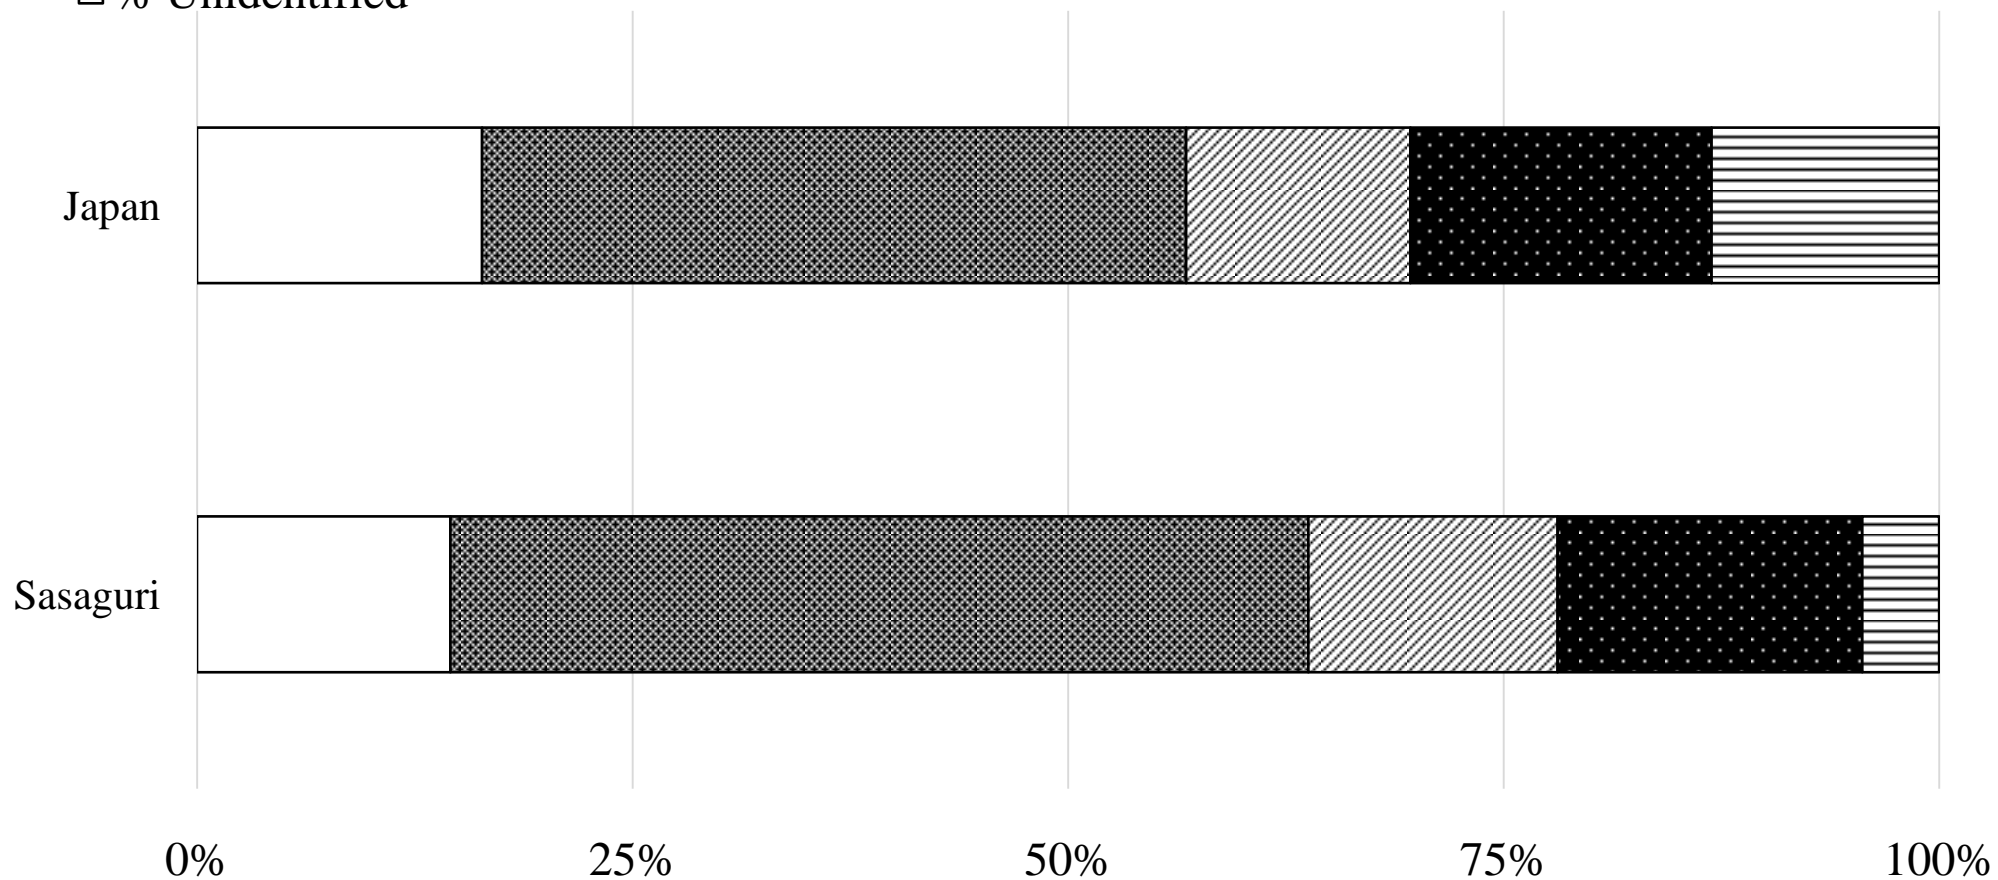

Supplement: MOESM1 [file 9738610]
